# Supplementary material
Source: PubMed Central journal article supplement (PMC4829353)
Supplement: NIHMS771376-supplement-supporting_figures.pdf [file NIHMS771376-supplement-supporting_figures.pdf]

## **Supporting Information**

### **EGFR Targeted Polymeric Mixed Micelles carrying Gemcitabine for treating Pancreatic Cancer**

Goutam Mondal<sup>1</sup>, Virender Kumar<sup>1</sup>, Surendra K. Shukla<sup>2</sup>, Pankaj K. Singh<sup>2</sup> and Ram I. Mahato <sup>1\*</sup>

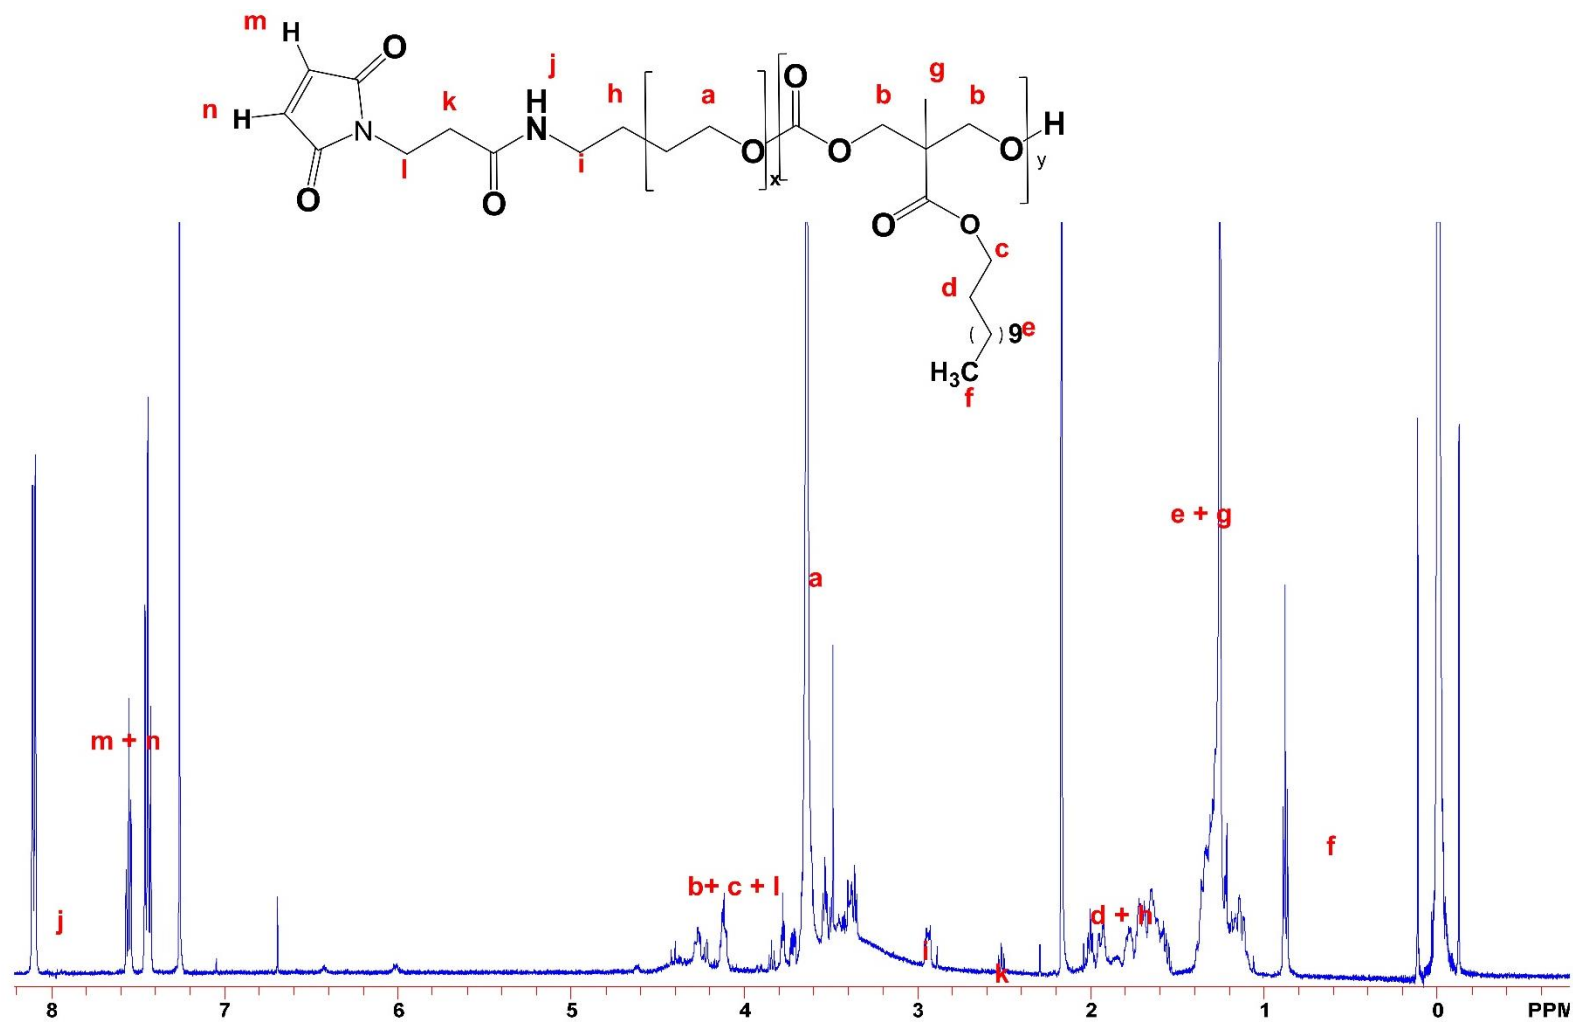Fig. S1. <sup>1</sup>H-NMR of MAL-PEG-PCD

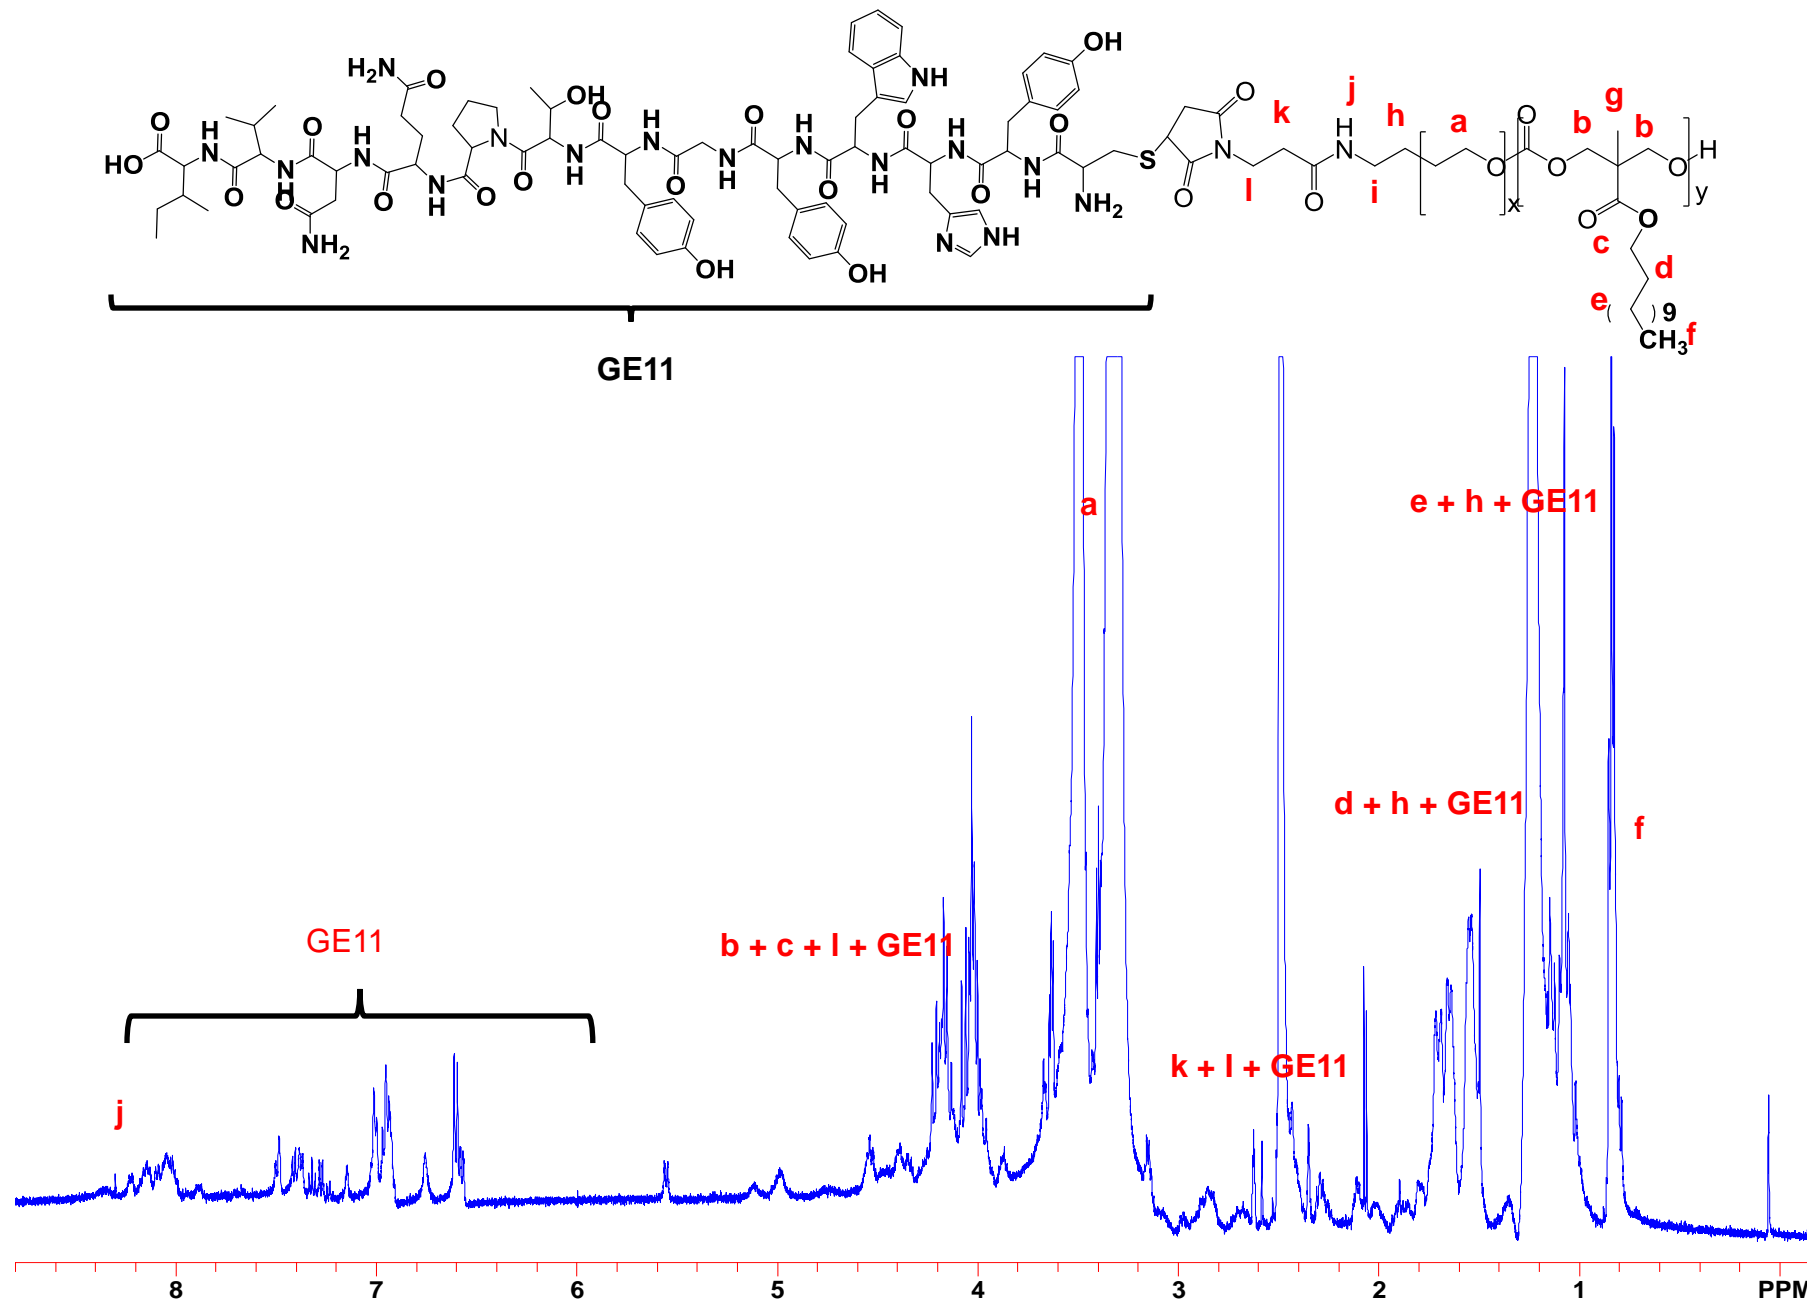Fig. S2.  $^1\text{H-NMR}$  of GE11-PEG-PCD

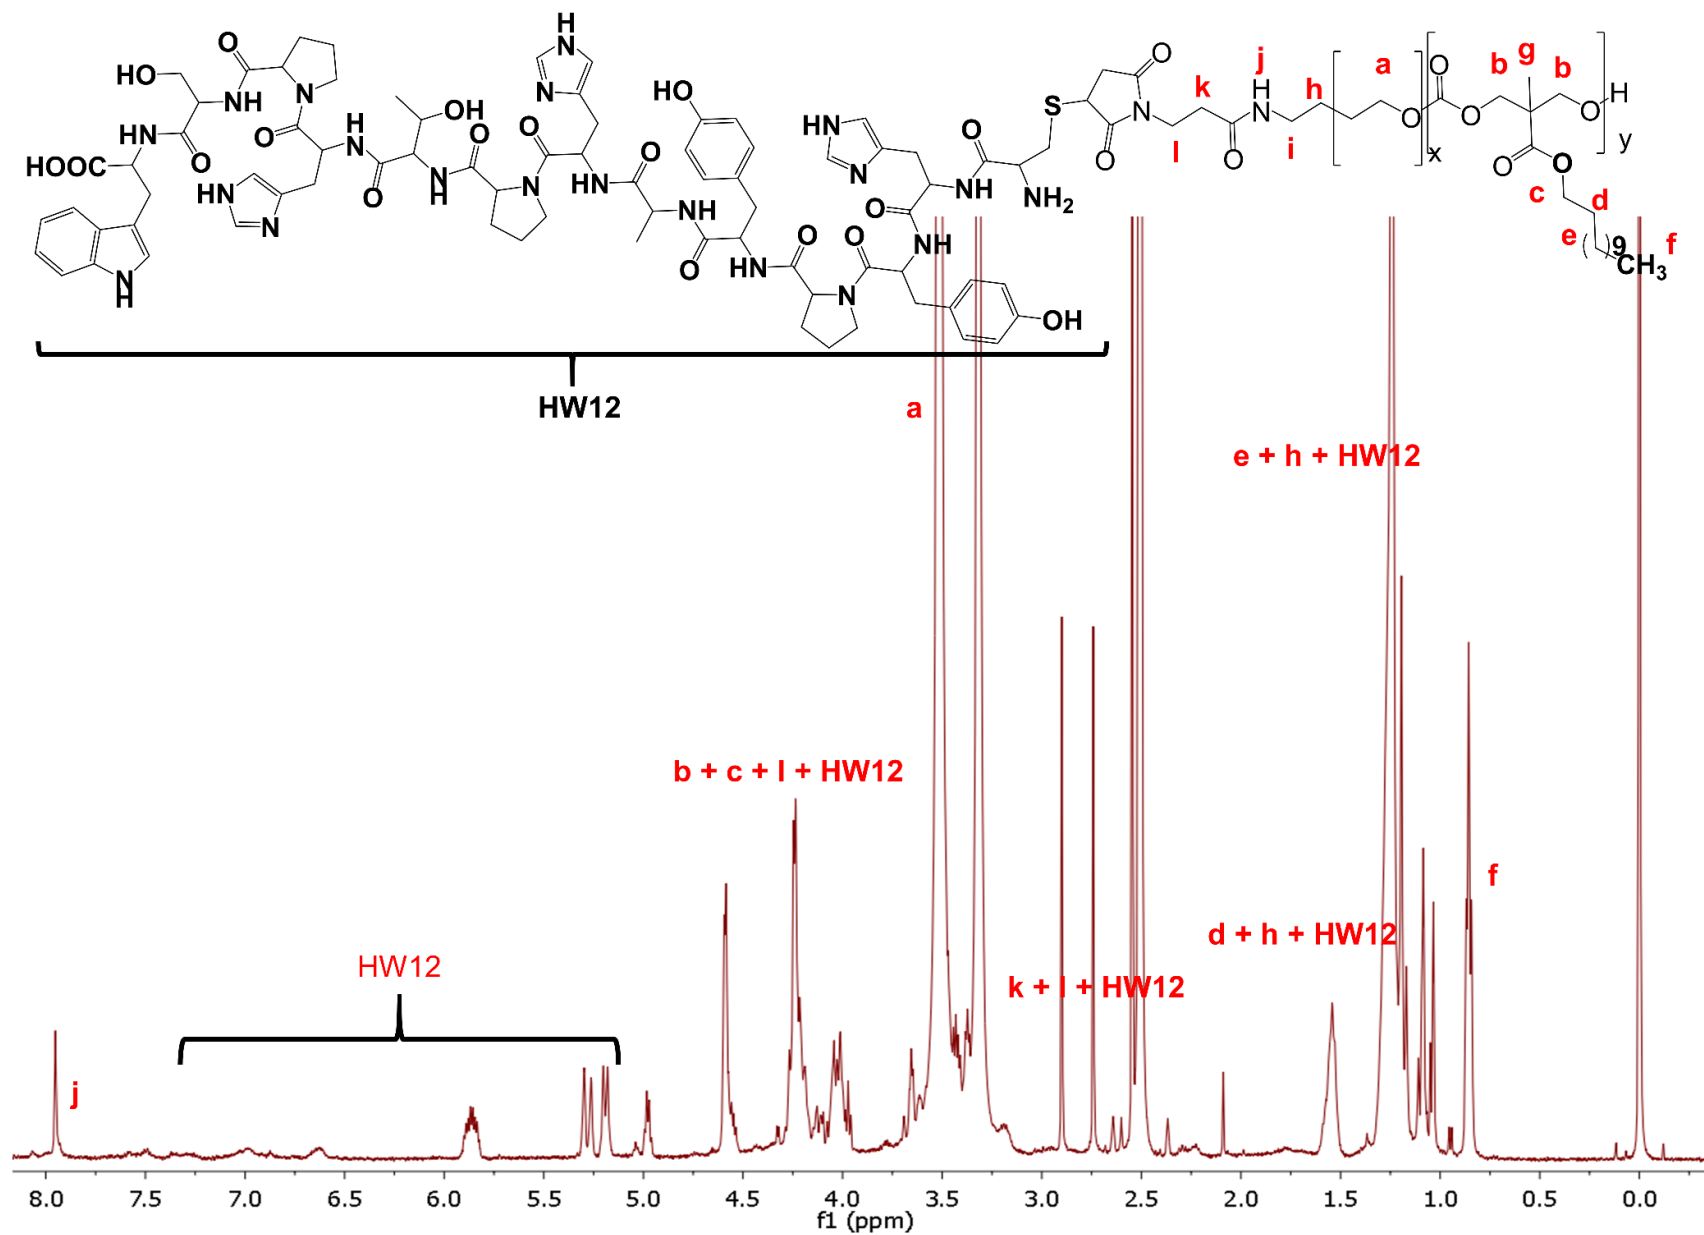Fig. S3. <sup>1</sup>H-NMR of HW12-PEG-PCD

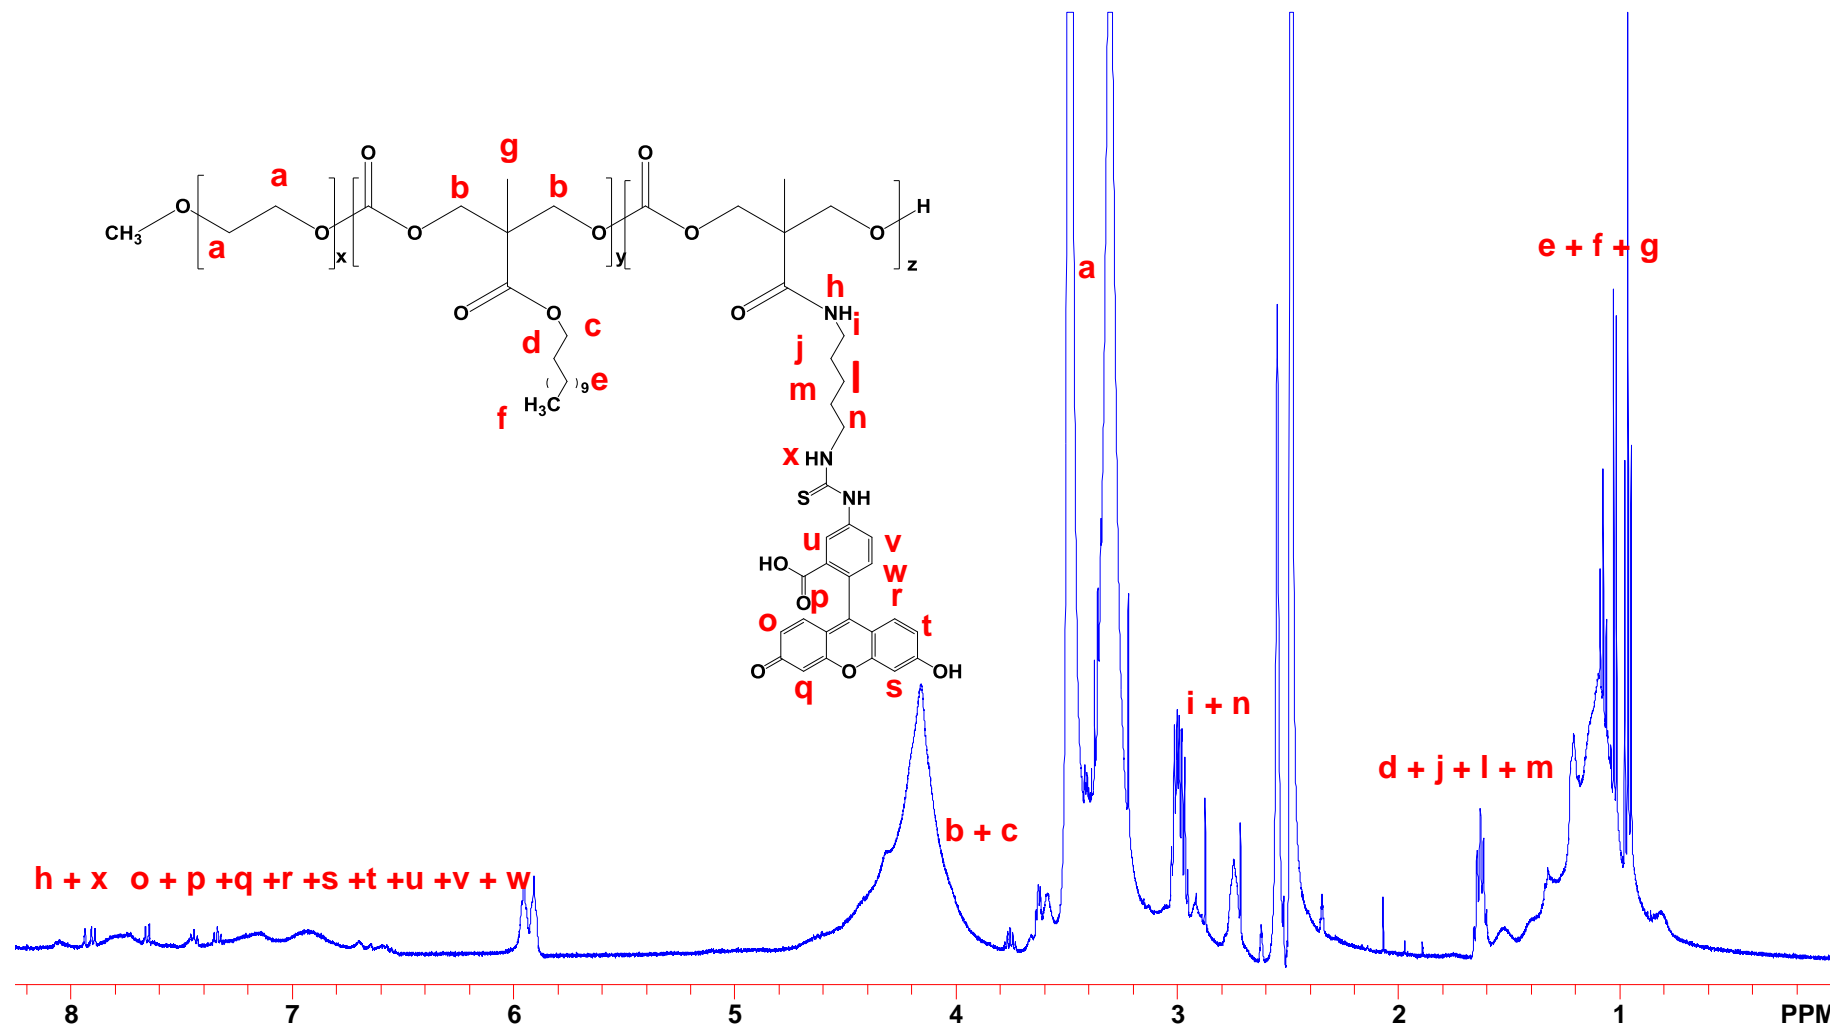Fig. S4.  $^1\text{H-NMR}$  of mPEG-b-PCC-g-FC-g-DC

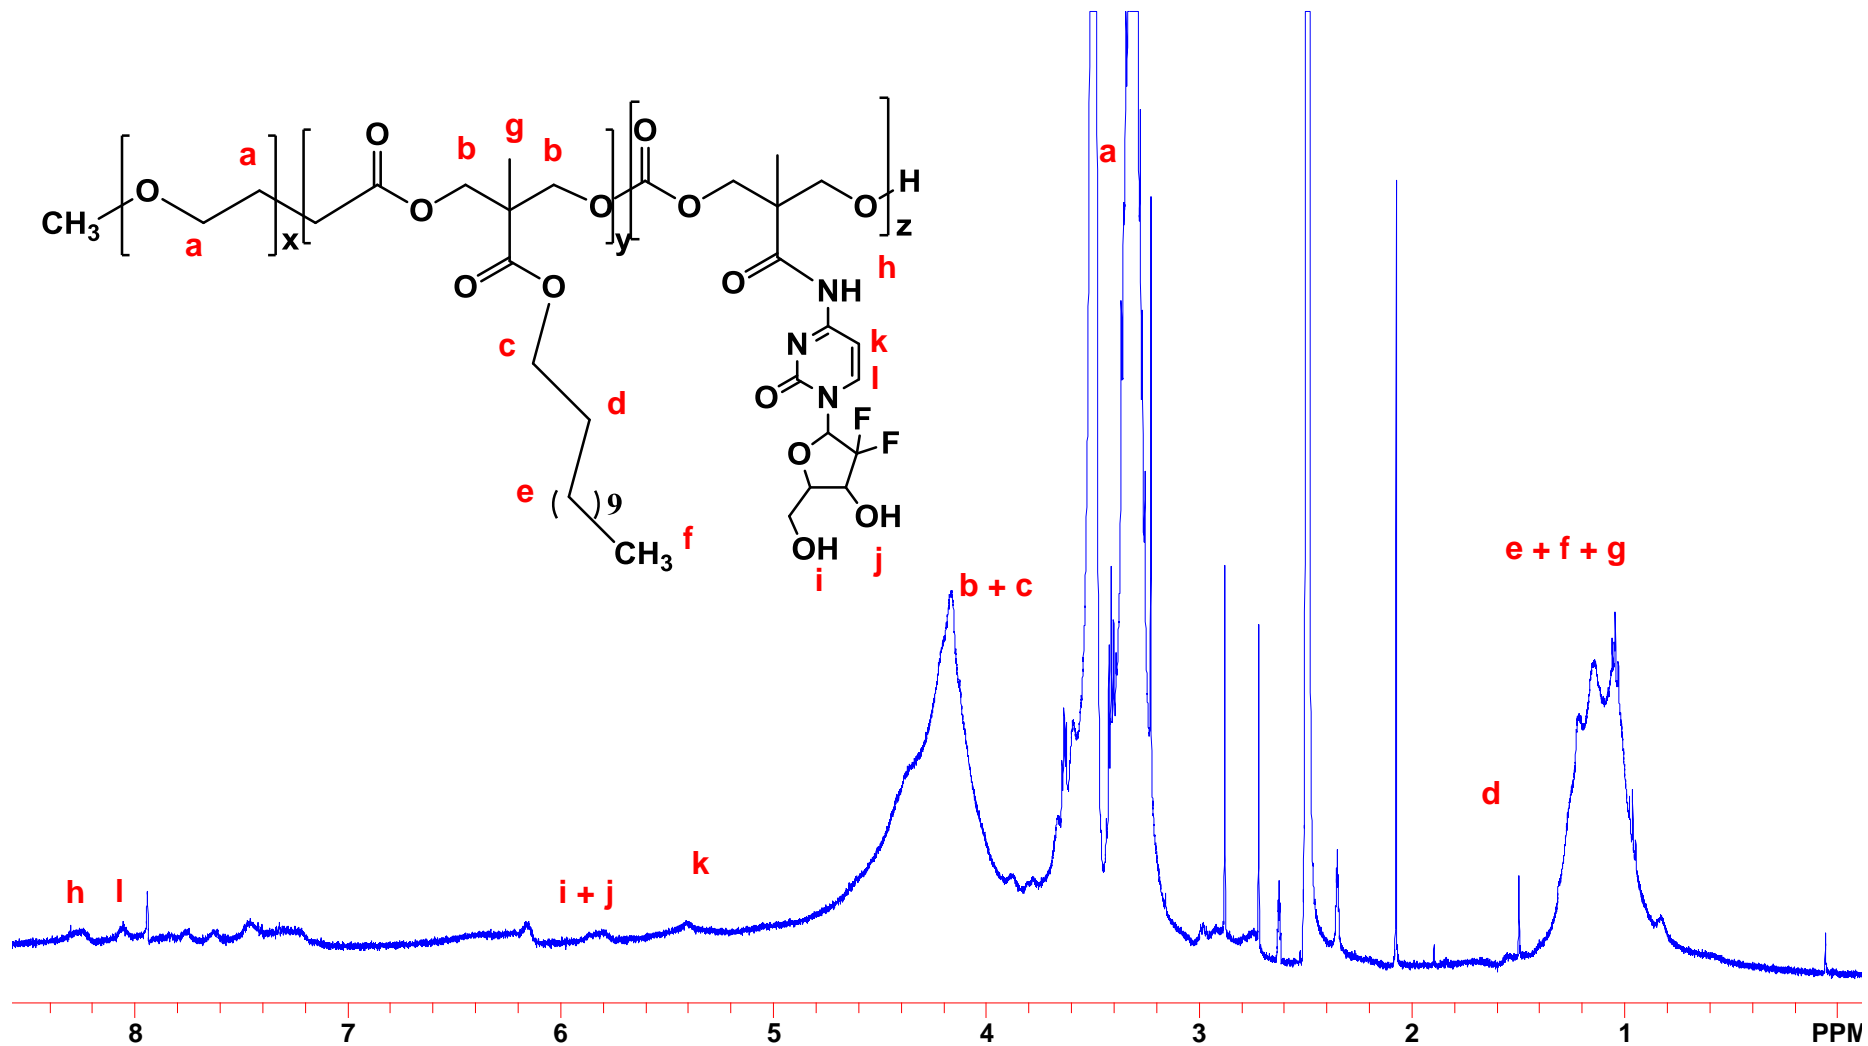Fig. S5.  $^1\text{H-NMR}$  of mPEG-b-PCC-g-GEM-g-DC

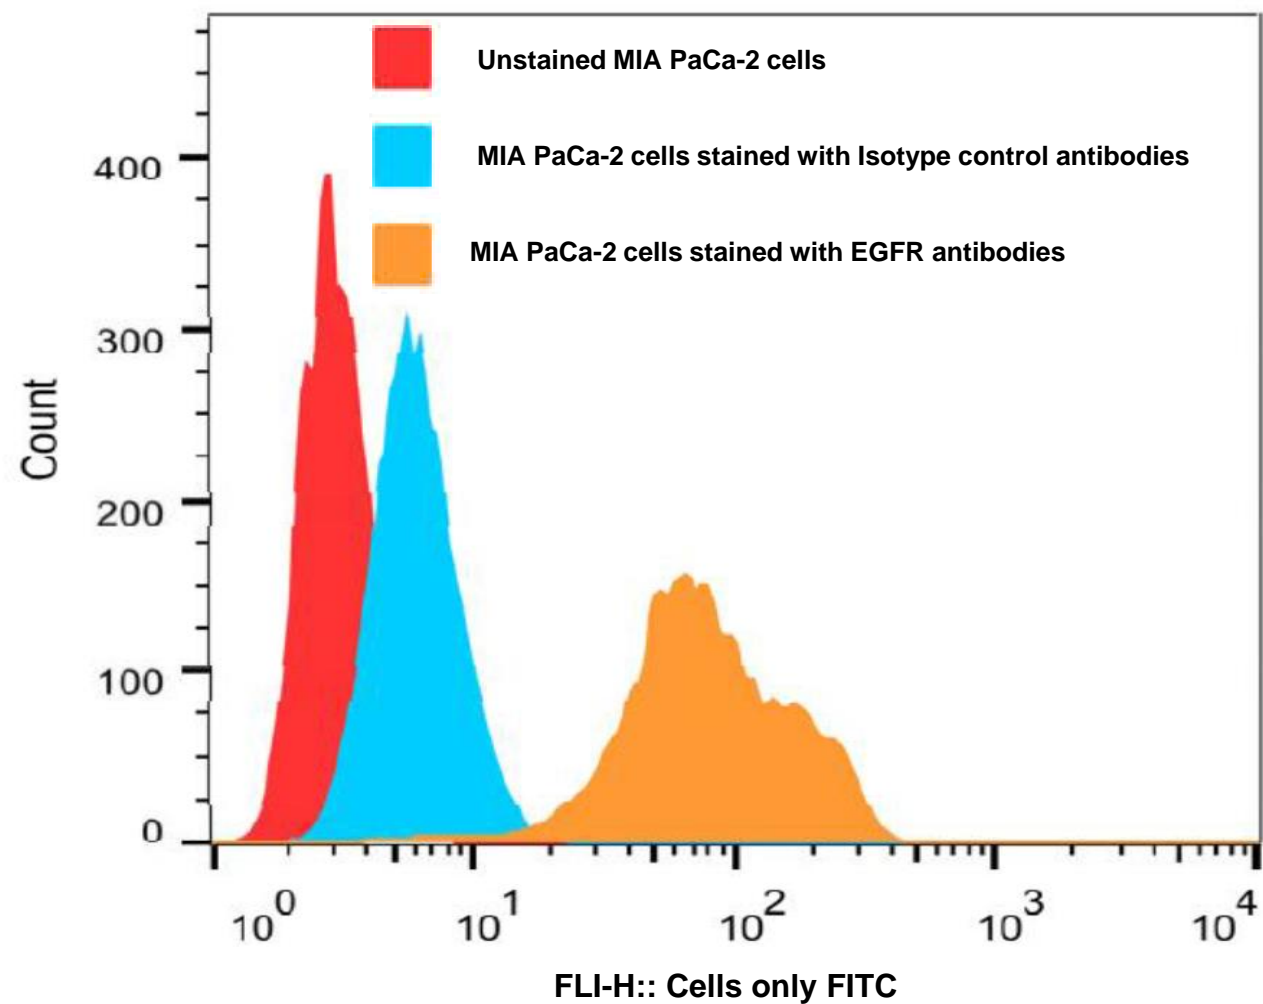

Fig. S6. EGFR expression in MIA PaCa-2 cells was analyzed by flow cytometry. The profiles represent the values of unstained MIA PaCa-2 cells (red), MIA PaCa-2 cells stained with mouse IgG1 monoclonal - Isotype control antibodies (light blue) and MIA PaCa-2 cells stained with mouse monoclonal antibodies to EGFR (orange).

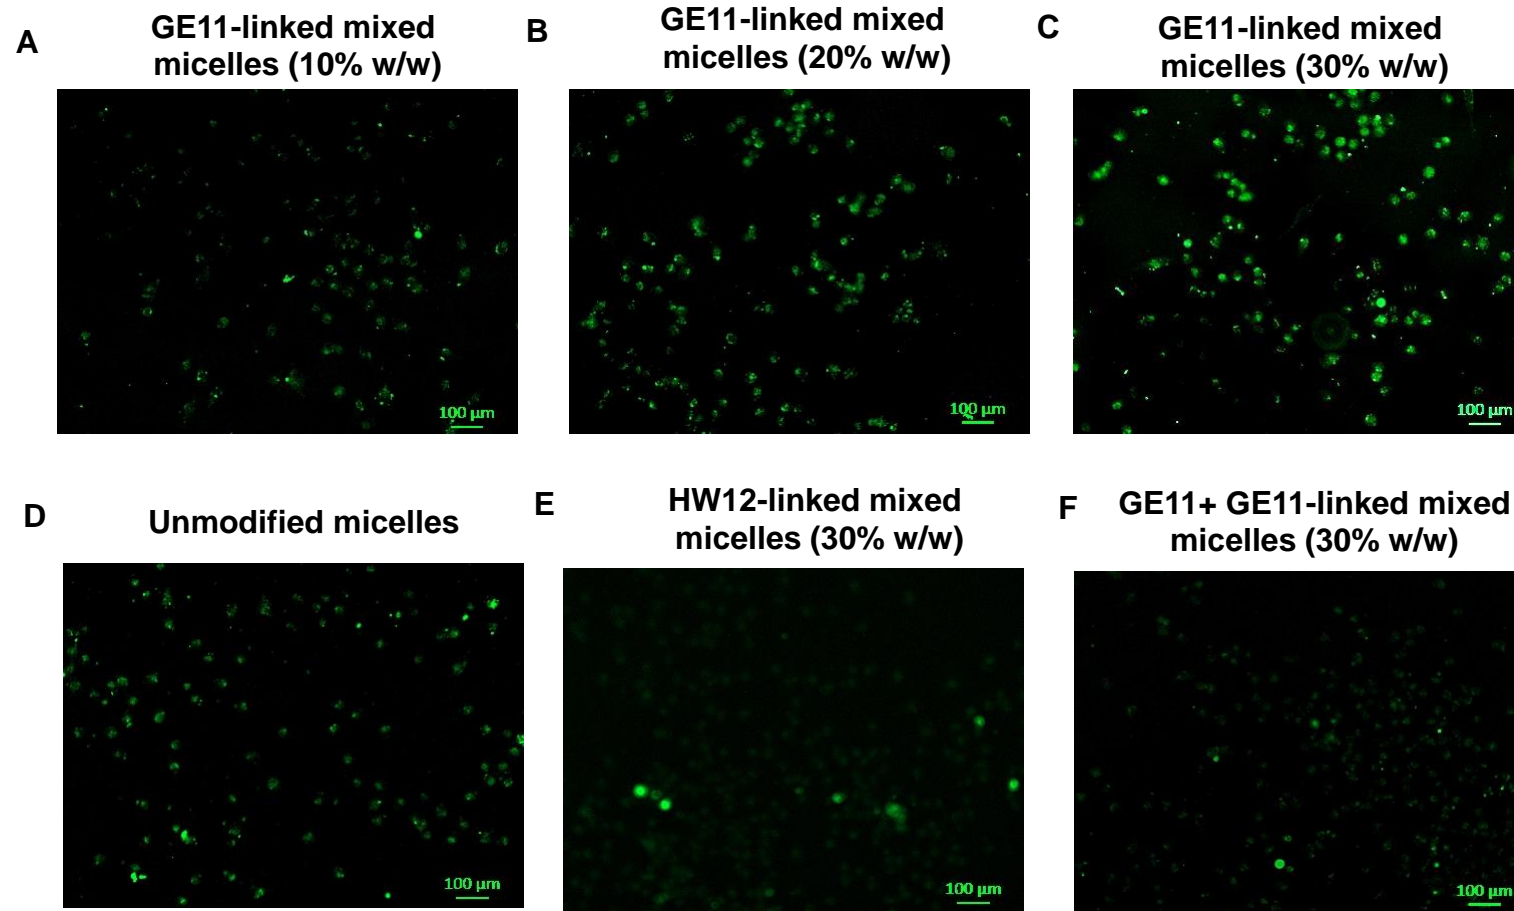

**Fig. S7.** Fluorescein cadaverine labeled GE11-linked mixed micelles can enter MIA PaCa-2 cells via EGF receptor. Epifluorescence microscopic images of cells treated with GE11-linked mixed micelles (10% w/w) (A), GE11-linked mixed micelles (20% w/w) (B), GE11-linked mixed micelles (30% w/w) (C), Unmodified micelles (D), HW12-linked mixed micelles (30% w/w) (E) respectively. MIA PaCa-2 cells were pre-incubated with GE11 peptide and then treated with GE11-linked mixed micelles (30% w/w) (F). Scale bar, 100 μM.



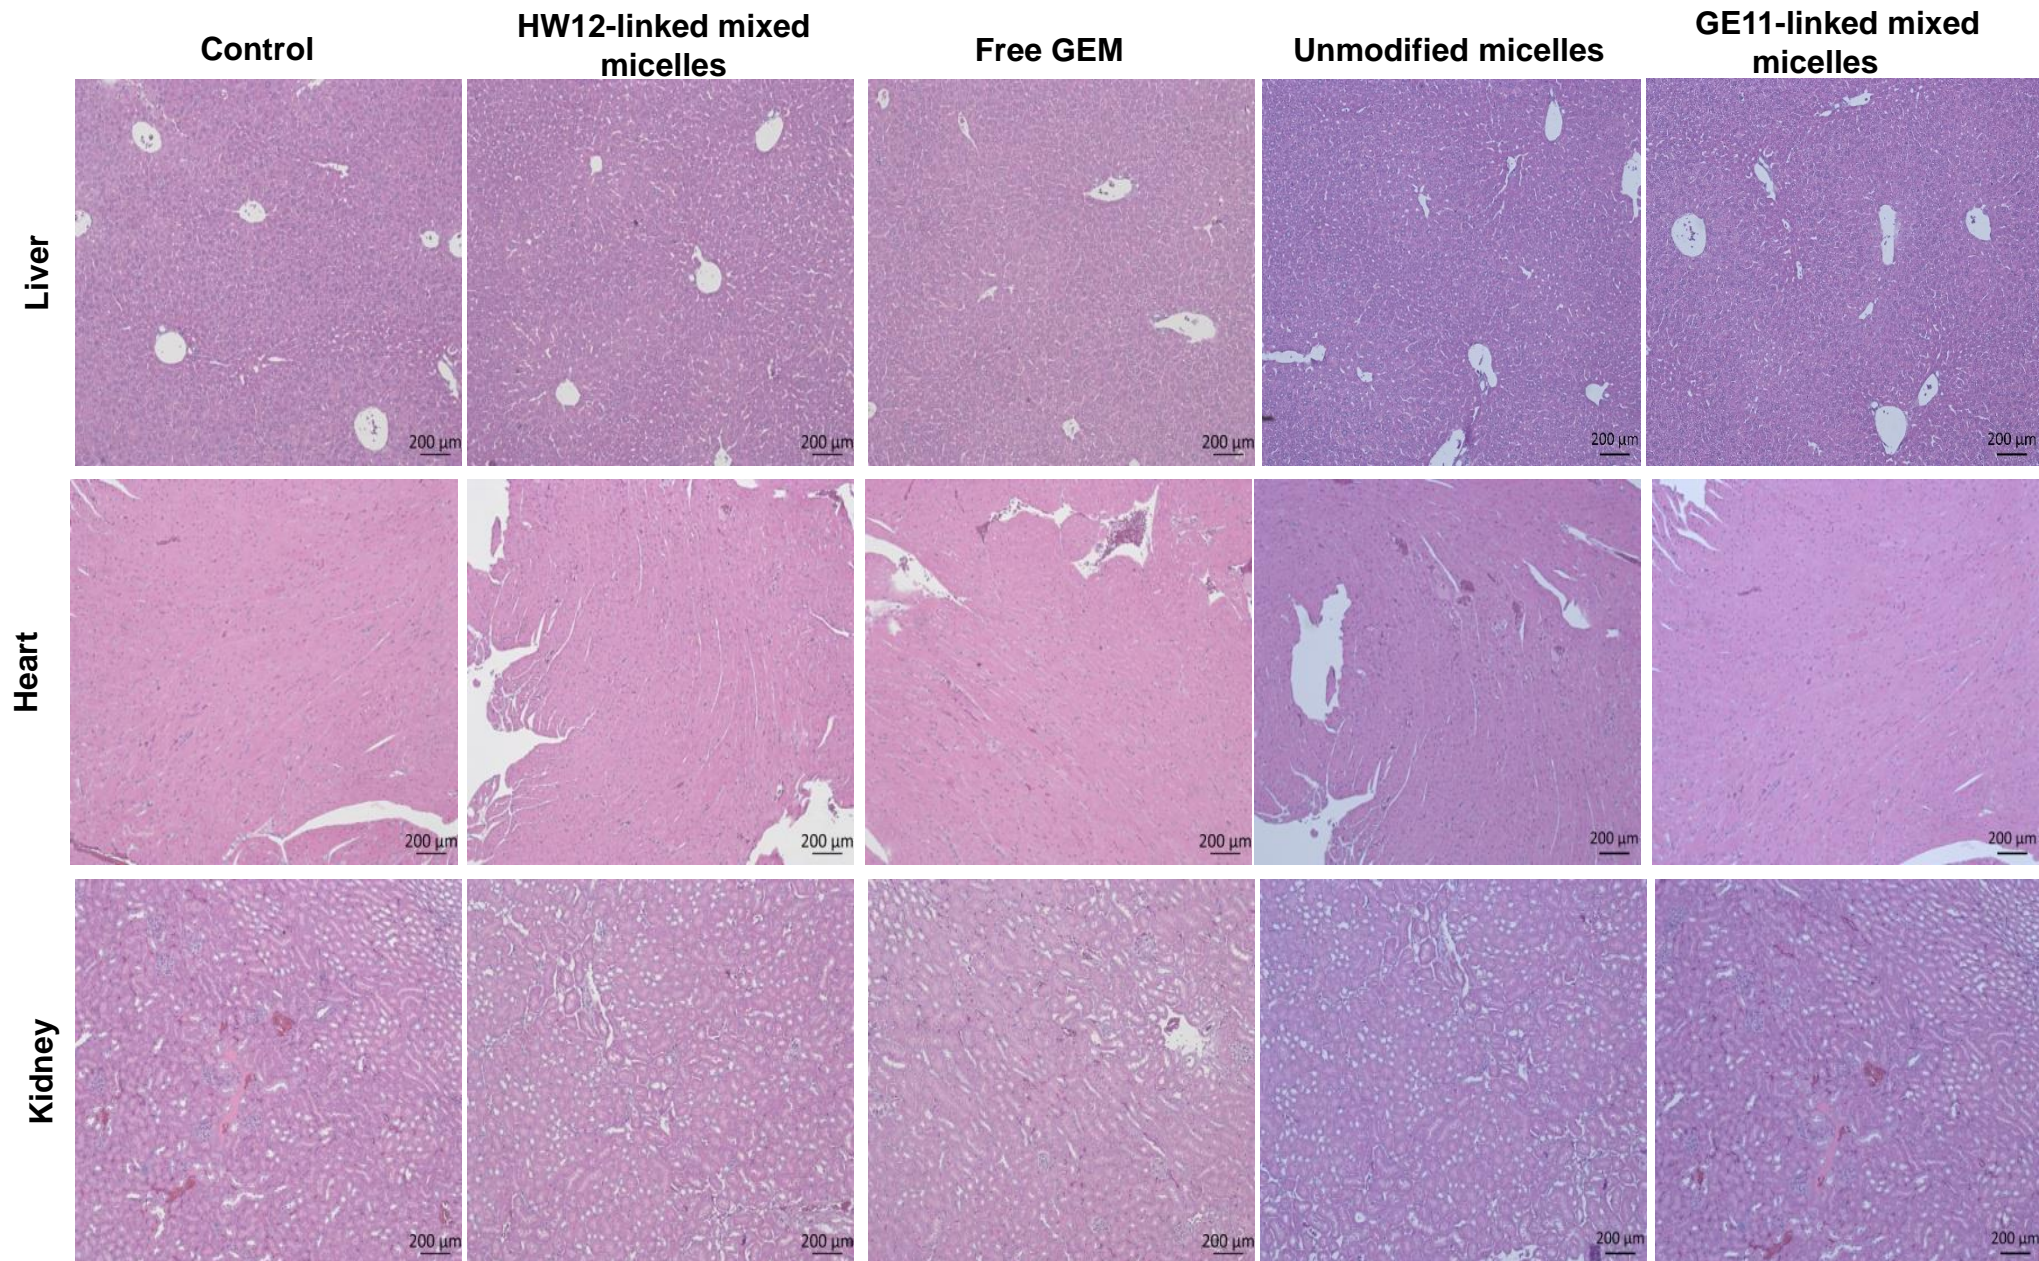

Fig. S8. Analysis of major organs (liver, heart and kidney) was performed for hematoxylin and eosin (H&E) staining. Scale bar, 200  $\mu$ M.
